# Supplementary material
Source: publisher figshare collection journal article supplement (https://plos.figshare.com/articles/dataset/_/117640)
Supplement: Supplementary file [file 1]

| Hour | 1        | 2     | 3     | 4     |
|------|----------|-------|-------|-------|
| 1    | --       | 0.492 | 0.524 | 0.555 |
| 2    | < 0.0001 | --    | 0.055 | 0.088 |
| 3    | < 0.0001 | 0.990 | --    | 0.035 |
| 4    | < 0.0001 | 0.692 | 1     | --    |
