# Supplementary material
Source: publisher figshare collection journal article supplement (https://plos.figshare.com/articles/dataset/_/117640)
Supplement: Supplementary file [file 1]

| Group Size | 5        | 10       | 20       | 30       | 50    |
|------------|----------|----------|----------|----------|-------|
| 5          | --       | 0.181    | 0.412    | 0.721    | 0.790 |
| 10         | < 0.0001 | --       | 0.295    | 0.785    | 0.889 |
| 20         | < 0.0001 | < 0.0001 | --       | 0.612    | 0.758 |
| 30         | < 0.0001 | < 0.0001 | < 0.0001 | --       | 0.314 |
| 50         | < 0.0001 | < 0.0001 | < 0.0001 | < 0.0001 | --    |
