# Supplementary material
Source: publisher figshare collection journal article supplement (https://plos.figshare.com/articles/dataset/_/117640)
Supplement: Supplementary file [file 1]

| Day | 1        | 2        | 3     | 4     | 5     |
|-----|----------|----------|-------|-------|-------|
| 1   | --       | 0.024    | 0.269 | 0.229 | 0.368 |
| 2   | 1        | --       | 0.249 | 0.210 | 0.348 |
| 3   | < 0.0001 | < 0.0001 | --    | 0.040 | 0.100 |
| 4   | < 0.0001 | < 0.0001 | 0.965 | --    | 0.141 |
| 5   | < 0.0001 | < 0.0001 | 0.091 | 0.005 | --    |
