# Supplementary material
Source: publisher figshare collection journal article supplement (https://plos.figshare.com/articles/dataset/_/117640)
Supplement: Supplementary file [file 1]

| Day       | 1      | 2      | 3       | 4       | 5       |
|-----------|--------|--------|---------|---------|---------|
| Schooling | 4.51 ± | 7.40 ± | 4.15 ±  | 3.75 ±  | 3.67 ±  |
| Shoaling  | 5.73 ± | 7.78 ± | 11.62 ± | 10.51 ± | 11.35 ± |
